# Supplementary material
Source: PubMed Central journal article supplement (PMC4734556)
Supplement: supp_pp.15.01194_PP2015-01194R1_Supplemental_Material.pdf [file supp_pp.15.01194_PP2015-01194R1_Supplemental_Material.pdf]

1  
2  
3  
4  
5  
6  
7  
8  
9  
10  
11  
12  
13  
14  
15  
16  
17  
18  
19

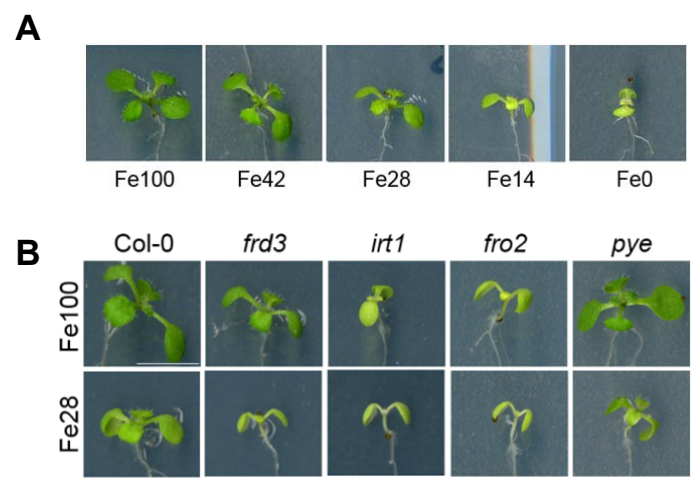

**Supplemental Figure S1.** Effect of Fe concentration on growth of mutants on high pH medium. A, Col-0 wild type seedlings were cultivated for 12 days on medium containing 100  $\mu$ M, 42  $\mu$ M, 28  $\mu$ M, 14  $\mu$ M, or no Fe(III)-EDTA. All media were buffered to pH 6.7 with 10 mM MES. B, Growth of Col-0 wild type and *frd3*, *irt1*, *fro2*, and *pye* mutants under Fe-sufficient (Fe100/Mn40) and Fe-deficient (Fe28/Mn40) conditions as employed in the screening. Seedlings were cultivated for 12 days.

20  
21  
22  
23  
24  
25  
26  
27  
28  
29  
30  
31  
32  
33  
34  
35  
36  
37  
38  
39  
40  
41  
42  
43

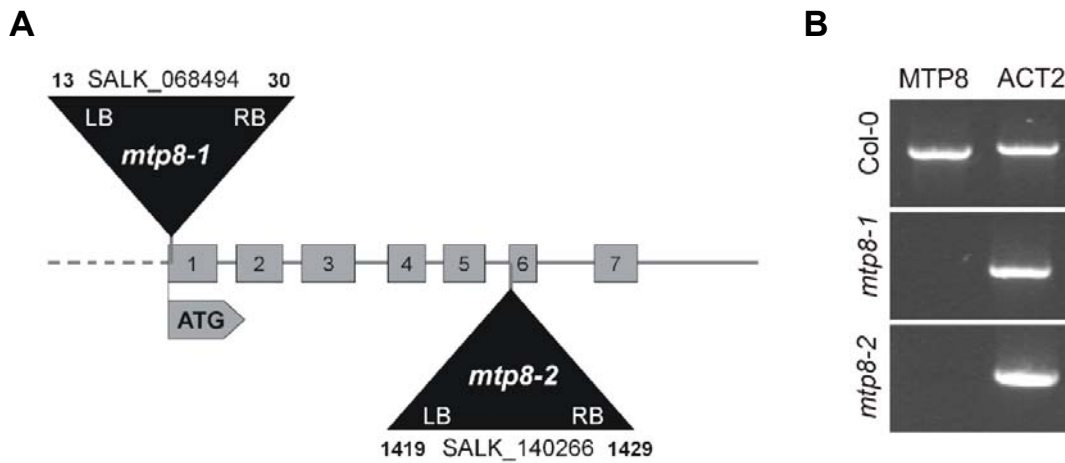

**Supplemental Figure S2.** Genotypical analysis of *MTP8* T-DNA mutant lines. A, Model of the *AtMTP8* genomic region and the T-DNA insertion sites in the mutant lines *mtp8-1* and *mtp8-2*. Coding regions are presented as grey boxes; introns are shown by a line. The triangle indicates the site of the T-DNA insertions. Numbers indicate the last remaining nucleotide before and the first nucleotide after the T-DNA, counting from the ATG. LB, left T-DNA border; RB, right T-DNA border. B, RT-PCR analysis on RNA isolated from seedlings of wild type and mutant lines showing the absence of the full-length *MTP8* transcript in the mutant lines. *ACT2* served as control.

44  
45  
46  
47  
48  
49  
50  
51  
52  
53  
54  
55  
56  
57  
58  
59  
60  
61  
62  
63  
64  
65  
66

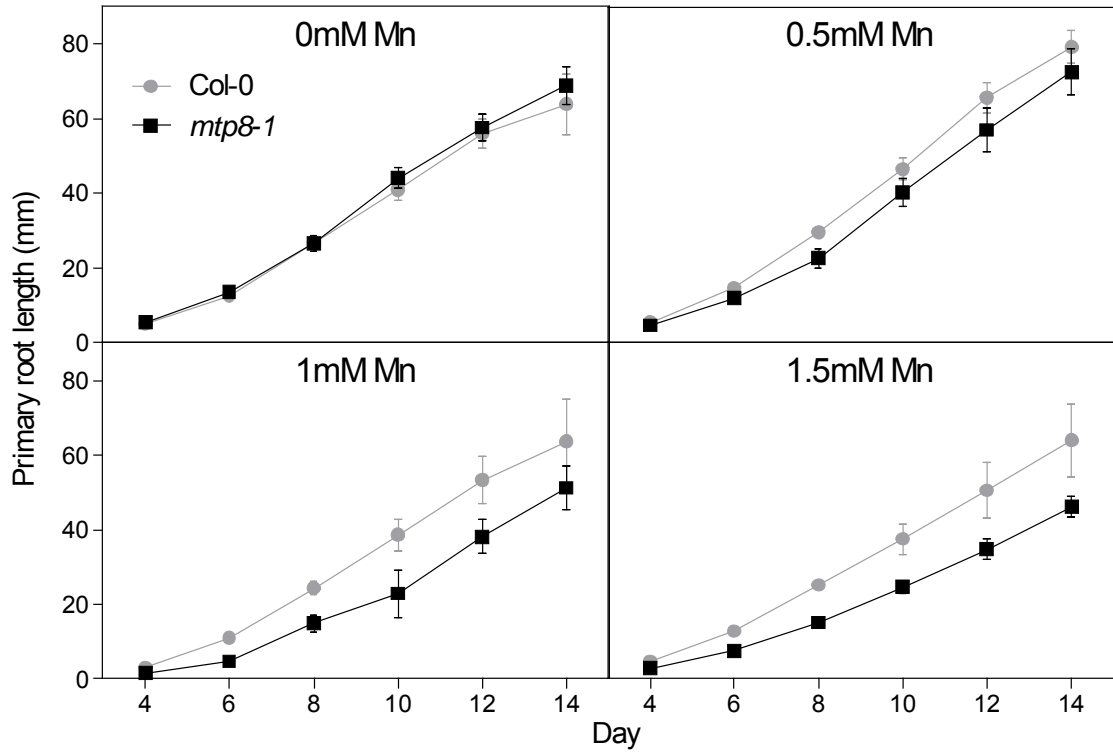

**Supplemental Figure S3.** Elongation of *mtp8-1* primary roots is hypersensitive to high Mn concentrations. Primary root lengths of Col-0 (circles) and *mtp8-1* (squares) seedlings on ½ MS medium supplemented with increasing amounts of Mn. Data represent the means ±SD of 16 seedlings per line.

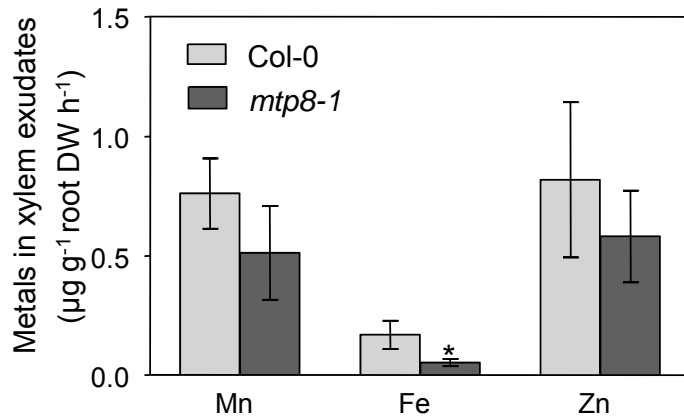

67

68

69 **Supplemental Figure S4.** Fe translocation in xylem stream is decreased in the  
 70 *mtp8-1* mutant. Six-week-old Col-0 (light grey) and *mtp8-1* (dark grey) plants growing  
 71 on liquid Fe28/Mn40 medium were decapitated. Xylem exudate was collected for 2 h  
 72 and analysed by ICP-MS. Data are from three plants per line. An asterisk indicates  
 73 that the mean of the mutant line is significantly different from the mean of Col-0  
 74 according to Student's t-test ( $P < 0.05$ ). Error bars represent  $\pm$ SD.

75

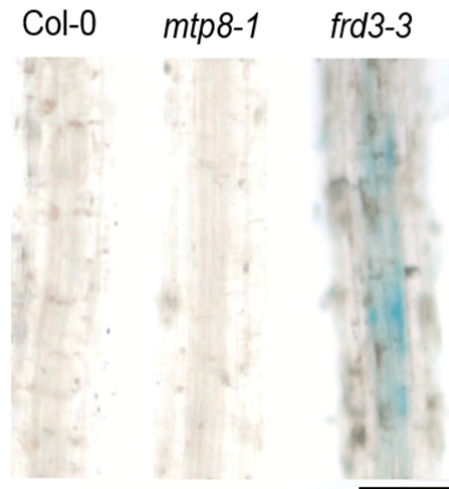

76

77

78 **Supplemental Figure S5.** Roots of the *mtp8-1* mutant do not accumulate iron. Col-0  
79 and *mtp8-1* seedlings were cultivated for 12 days on Fe28/Mn40 agar plates. Roots  
80 of the seedlings were excised, incubated in Perls' solution for one hour, washed in  
81 distilled water, and observed under the microscope. The *frd3-3* mutant line cultivated  
82 on Fe100/Mn40 was used as a positive control for the staining. Bar: 100  $\mu$ m.

83

84

85  
86  
87  
88  
89  
90  
91  
92  
93  
94  
95  
96  
97  
98  
99  
100  
101  
102  
103  
104  
105  
106  
107  
108  
109  
110  
111  
112  
113  
114  
115  
116  
117

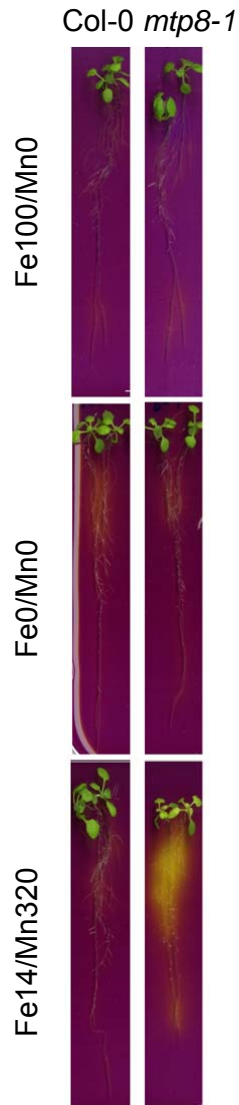

**Supplemental Figure S6.** Rhizosphere acidification under Fe deficiency is enhanced in *mtp8-1* in the presence of Mn. Plants were precultured on the indicated Fe/Mn regimes for 72 h, transferred to agar plates containing bromocresol purple, and incubated for 24 h. Yellow color around the roots indicates acidification.

118 **Supplemental Table S1.** T-DNA mutants screened for sensitivity to low Fe availability.

|  | Line Code | Gene Code    |           | Line Code | Gene Code     |           | Line Code | Gene Code        |           |
|--|-----------|--------------|-----------|-----------|---------------|-----------|-----------|------------------|-----------|
|  | 1         | SALK_144164C | At1g09790 | 40        | SALK_080688C  | At4g38950 | 80        | SALK_103699C     | At1g11840 |
|  | 2         | SALK_147451C | At3g46900 | 41        | SALK_011913C  | At4g29220 | 81        | SALK_058904C     | At3g47650 |
|  | 3         | SALK_109396C | At5g47910 | 42        | SALK_107939C  | At3g51200 | 82        | SALK_040185C     | At1g23020 |
|  | 4         | SALK_132418C | At3g13610 | 43        | SALK_042794C  | At3g61930 | 83        | SALK_017016C     |           |
|  | 5         | SALK_121565C | At5g13740 | 44        | SALK_048526C  | At1g05700 | 84        | SALK_096228C     | At3g47420 |
|  | 6         | SALK_082635C | At2g30660 | 45        | SALK_085412C  | At4g21910 | 85        | SALK_096539C     | At3g47630 |
|  | 7         | SALK_118446C | At3g48450 | 46        | SALK_136932C  | At1g60610 | 86        | SALK_043140C     | At5g45410 |
|  | 8         | SALK_080218C | AT1G19000 | 47        | SALK_008958C  | At4g02330 | 87        | SALK_151290C     | At1g03080 |
|  | 9         | SALK_088311C | At2g47000 | 48        | SALK_015054C  | At1g74770 | 88        | SALK_051706C     |           |
|  | 10        | SALK_057638C | At3g53280 | 49        | SALK_146998C  | At5g53450 | 89        | SALK_053278C     | At5g03140 |
|  | 11        | SALK_043881C | At4g14680 | 50        | SALK_018370C  | At5g55620 | 90        | SALK_204565C     | At3g55430 |
|  | 12        | SALK_009007C | At1g05300 | 51        | SALK_035416   | At1g57560 | 91        | SALK_149052C     |           |
|  | 13        | SALK_036012C | At3g18290 | 52        | SALK_048470C  | At1g18910 | 92        | SAIL_74_B07      | At1g74780 |
|  | 14        | SALK_003255C | At4g26890 | 53        | SALK_040332C  | At5g38820 | 93        | SALK_110010C     |           |
|  | 15        | SALK_074896C | At5g37260 | 54        | SALK_094426   | At1g09560 | 94        | SALK_113040C     | At3g57070 |
|  | 16        | SALK_140266C | At3g58060 | 55        | SALK_078702   | At3g50740 | 95        | SALK_131929C     | At5g03210 |
|  | 17        | SALK_133841C | At2g35930 | 56        | SALK_128043C  | At2g45400 | 96        | SALK_030632 C    |           |
|  | 18        | SALK_133954C | At1g49820 | 57        | SALK_080627C  | At1g68650 | 97        | SAIL_1255_G10    | At1g74790 |
|  | 19        | SALK_057798C | At4g25640 | 58        | SALK_023292C  | At5g67370 | 98        | SALK_029828C     |           |
|  | 20        | SALK_147453C | At4g25640 | 59        | SALK_081645C  | At4g10510 | 99        | SALK_200963C     | At1g23030 |
|  | 21        | SALK_025900  | At1g11670 | 61        | SALK_132418C  | At3g13610 | 100       | SALK_006284C     | At3g48140 |
|  | 22        | SALK_019139C | At2g36885 | 62        | SALK_019569C  | At1g17260 | 101       | SALK_204374C     |           |
|  | 23        | SALK_023076C | At1g33090 | 63        | SALK_095937C  | At3g06890 | 102       | SALK_003991C     | At3g55440 |
|  | 24        | SALK_066923C | At2g20030 | 64        | SALK_016715C  | At4g31950 | 103       | SALK_100762C     | At2g30090 |
|  | 25        | SALK_035704C | At3g53480 | 65        | SALK_130376C  | At3g21690 | 104       | SALK_093190C     | At5g14960 |
|  | 26        | SALK_071767C | At5g05250 | 66        | SALK_140776C  | At2g19410 | 105       | SALK_071809 C    |           |
|  | 27        | SALK_107837C | At1g77280 | 67        | SALK_076701C  | At1g75200 | 106       | SALK_090862C     | At3g47660 |
|  | 28        | SALK_045057C | At3g58810 | 68        | SALK_118350C  | At2g18960 | 107       | SALK_063364C     |           |
|  | 29        | SALK_110829C | At1g01570 | 69        | SALK_120680C  | AT4G22880 | 108       | SALK_107945C     | At3g47430 |
|  | 30        | SALK_063184  | AT1G49960 | 70        | SALK_105742C  | AT3G60330 | 109       | SALK_005625C     | At2g14850 |
|  | 31        | SALK_034026  | At5g36890 | 71        | SALK_131820 C | At3g48450 | 110       | SALK_141935C     |           |
|  | 32        | SALK_140776C | At2g19410 | 72        | SALK_054106C  | At4g14680 | 111       | SALK_054389C     | At5g03230 |
|  | 33        | SALK_073511C | At4g30120 | 73        | SALK_121588 C | AT4G22880 | 112       | SALK_052443C     |           |
|  | 34        | SALK_020101C | At5g04730 | 74        | GABI_797D03   | At3g59030 | 113       | SALK_141821C     | At5g14950 |
|  | 35        | SALK_138196  | At3g11750 | 75        | SALK_106967C  | AT1G49960 | 114       | SAIL_703_C10     |           |
|  | 36        | SALK_012767  | At3g07720 | 76        | SALK_127844C  | AT2G24520 | 115       | SAIL_1214_C01    | At2g30100 |
|  | 37        | SALK_099407C | At4g10510 | 77        | SALK_048598C  | At1g17260 | 116       | SALK_052766C     |           |
|  | 38        | SALK_072019C | At3g61410 | 78        | SALK_052070C  | At5g53450 | 117       | SALK_073451C     | At1g72460 |
|  | 39        | SALK_123168C | At1g34760 | 79        | SALK_063470C  | At2g35930 | 118       | SALK_136462      |           |
|  |           |              |           |           |               |           | 119       | SAIL_1156_C06    | At1g72450 |
|  |           |              |           |           |               |           |           | SAIL_267_C12     | At1g68580 |
|  |           |              |           |           |               |           |           | SALK_045661C     |           |
|  |           |              |           |           |               |           |           | SALK_111412C     | At2g46060 |
|  |           |              |           |           |               |           |           | SAIL_813_E05     | At3g13710 |
|  |           |              |           |           |               |           |           | SAIL_1254_A07    | At2g24550 |
|  |           |              |           |           |               |           |           | SALK_025606C     | At1g72440 |
|  |           |              |           |           |               |           |           | SALK_130654C     | At2g15440 |
|  |           |              |           |           |               |           |           | SALK_205573C     |           |
|  |           |              |           |           |               |           |           | SALK_205342C     | At4g23010 |
|  |           |              |           |           |               |           |           | SALK_205869C     | At4g00590 |
|  |           |              |           |           |               |           |           | SAIL_768_F02     | At3g02140 |
|  |           |              |           |           |               |           |           | SALK_137966C     | At1g03090 |
|  |           |              |           |           |               |           |           | SALK_073394C     |           |
|  |           |              |           |           |               |           |           | SALK_200761C     | At3g15210 |
|  |           |              |           |           |               |           |           | SALK_120395C     | At2g24545 |
|  |           |              |           |           |               |           |           | SALK_094145 C ,S | At5g45307 |

119  
120

121 **Supplemental Table S2.** Primers used in this study.

| Name                    | Purpose                                                          | Sequence                                |
|-------------------------|------------------------------------------------------------------|-----------------------------------------|
| MTP8_494_F              | T-DNA screen <i>mtp08-1</i><br>forward                           | ACGCGCTGATGTGAGCATT                     |
| MTP8_494_R              | T-DNA screen <i>mtp08-1</i><br>reverse                           | CCCAATTTGAGATTTGCATGG                   |
| MTP8_226_F              | T-DNA screen <i>mtp08-2</i><br>forward                           | CGCAACCGCTATTAAACTCGT                   |
| MTP8_226_R              | T-DNA screen <i>mtp08-2</i><br>reverse                           | GATTCACCAATCGCATGAGC                    |
| SALK_LBa1               | T-DNA screen                                                     | TGGTTCACGTAGTGGGCCATCG                  |
| SALK_RBb                | T-DNA screen                                                     | CAGTCATAGCCGAATAGCCTCTCC                |
| MTP8_F-NotI             | cloning in pFL61<br>forward                                      | AAAAAAGCGGCCGCATGGAAGTCAATTATTGTCCGGA   |
| MTP8_R-NotI             | cloning in pFL61<br>reverse                                      | AAAAAAGCGGCCGCTCATAAATCGTTGGGGATTGTAGA  |
| MTP8_F-XmaI             | cloning in pART7-EYFP<br>forward                                 | AAAAAACCCGGGATGGAAGTCAATTATTGTCCGGA     |
| MTP8_R-XmaI<br>(nostop) | cloning in pART7-EYFP<br>(gene N-terminal of<br>EYFP)<br>reverse | AAAAAACCCGGGTGCTAAATCGTTGGGGATTGTAGA    |
| MTP8_R-XmaI             | cloning in pART7-EYFP<br>(gene C-terminal of<br>EYFP)<br>reverse | AAAAAACCCGGGTCATAAATCGTTGGGGATTGTAGA    |
| MTP8_gDNA_F-<br>XmaI    | cloning in pBI101<br>forward                                     | AAAAAACCCGGGGCATTCTCCTGTAAACGGAAGC      |
| MTP8_gDNA_R-<br>XmaI    | cloning in pBI101<br>reverse                                     | AAAAAACCCGGGTTCTGGAAAATTATTAACAAATCATCG |
| MTP8_rt_F               | qRT-PCR forward                                                  | TTGTGCGAGGTGGATATAGAACTGCC              |
| MTP8_rt_R               | qRT-PCR reverse                                                  | GGAATGTTTCAGGCTTGTGATGACA               |
| At4g05320_rt_F          | qRT-PCR forward                                                  | CACACTCCACTTGGTCTTGCGT                  |
| At4g05320_rt_R          | qRT-PCR reverse                                                  | TGGTCTTTCCGGTGAGAGTCTTCA                |
| At3g18780_rt_F          | qRT-PCR forward                                                  | TCCCTCAGCACATTCCAGCAGAT                 |
| At3g18780_rt_R          | qRT-PCR reverse                                                  | AACGATTCTGGACCTGCCTCATC                 |
| At5g60390_rt_F          | qRT-PCR forward                                                  | TGAGCACGCTCTTCTTGCTTTCA                 |
| At5g60390_rt_R          | qRT-PCR reverse                                                  | GGTGGTGGCATCCATCTTGTTACA                |
| bhlh38_F                | qRT-PCR forward                                                  | AATCAATACGAAAGCTATTACGGT                |
| bhlh38_R                | qRT-PCR reverse                                                  | TAAGCTCTTTGAAACCGTTTC                   |
| bhlh101_F               | qRT-PCR forward                                                  | CTTTCTGATCAAAAGAGGAAGCTGAG              |
| bhlh101_R               | qRT-PCR reverse                                                  | GAAACAGATGTCCATTTTCGACGT                |
| PYE_F                   | qRT-PCR forward                                                  | CAGGACTTCCCATTTTCCAA                    |
| PYE_R                   | qRT-PCR reverse                                                  | CTTGTGTCTGGGGATCAGGT                    |
| BTS_F                   | qRT-PCR forward                                                  | GCTCTGGCACAAGTCAATCA                    |



|             |                 |                         |
|-------------|-----------------|-------------------------|
| BTS_R       | qRT-PCR reverse | CGTTCATCAAATGCCGATAA    |
| at3g12900_F | qRT-PCR forward | GCGGAGCATAGGGTTCGAA     |
| at3g12900_R | qRT-PCR reverse | GGGATTTGGTGCCGTGAA      |
| MYB72_F4    | qRT-PCR forward | TCATGATCTGCTTTTGTGCTTTG |
| MYB72_R4    | qRT-PCR reverse | ACGAGATCAAAAACGTGTGGAAC |
| IRT1_F      | qRT-PCR forward | CGGTTGGACTTCTAAATGC     |
| IRT1_R      | qRT-PCR reverse | CGATAATCGACATTCCACCG    |
| FIT_F       | qRT-PCR forward | GGAGAAGGTGTTGCTCCATCTC  |
| FIT_R       | qRT-PCR reverse | GTCTCGAATTTGAACGGATTGG  |
| AtNAS4_F    | qRT-PCR forward | ATCGGTTTATCACCCCTACCG   |
| AtNAS4_R    | qRT-PCR reverse | TCACGTGGATCTTGGAACAG    |
| UBQ2F       | qRT-PCR forward | CCAAGATCCAGGACAAAGAAGGA |
| UBQ2R       | qRT-PCR reverse | TGGAGACGAGCATAAACAATTG  |

122

123
